# Supplementary material
Source: publisher figshare collection journal article supplement (https://acs.figshare.com/ndownloader/files/28912937)
Supplement: Supplementary file 1 [file 28912937]

***Supporting Information for***

**Lattice-Directed Stabilization of Different Spin-State  
Phases in Metallo-Supramolecular Chains on Au  
Surfaces**

*Jing Liu,<sup>1,\*</sup> Jie Li,<sup>2,3</sup> Qiwei Chen,<sup>4</sup> Qiang Xue,<sup>2</sup> Yifan Wang,<sup>2</sup> Bin Di,<sup>4</sup> Yongfeng Wang,<sup>1,2,\*</sup> Kai  
Wu<sup>4</sup>*

<sup>1</sup>Division of Quantum State of Matter, Beijing Academy of Quantum Information Sciences,  
Beijing 100193, China

<sup>2</sup>Key Laboratory for the Physics and Chemistry of Nanodevices and Center for Carbon-based  
Electronics, Department of Electronics, Peking University, Beijing 100871, China

<sup>3</sup>Peking University Information Technology Institute (Tianjin Binhai), Tianjin 300450, China

<sup>4</sup>BNLMS, College of Chemistry and Molecular Engineering, Peking University, Beijing 100871,  
China

\*Emails: liujing@baqis.ac.cn, yongfengwang@pku.edu.cn

## ***Table of Contents***

### **Supporting Discussion**

- |                                                                                                              |    |
|--------------------------------------------------------------------------------------------------------------|----|
| 1. Fano-fitting of the $dI/dV$ spectra                                                                       | S3 |
| 2. Comparison of the experimental wide-range $dI/dV$ spectrum and the calculated DOS of the LS-Ni on Au(100) | S4 |
| 3. Comparison of the experimental wide-range $dI/dV$ spectrum and the calculated DOS of the HS-Ni on Au(110) | S4 |

### **Supporting Figures**

- |                                                                                                                                                                         |    |
|-------------------------------------------------------------------------------------------------------------------------------------------------------------------------|----|
| <b>Figure S1.</b> Large-area STM image of the coordination chains formed on Au(100)                                                                                     | S5 |
| <b>Figure S2.</b> Representative STM image and $dI/dV$ spectrum of the coordination chains formed on Au(111)                                                            | S5 |
| <b>Figure S3.</b> $dI/dV$ spectrum and calculated DOS of the LS-Ni atom on Au(100)                                                                                      | S6 |
| <b>Figure S4.</b> STM image of the coordination chains formed on Au(110) with linear defects between the neighboring chains                                             | S6 |
| <b>Figure S5.</b> STM images of the molecular structures formed on Au(110) showing the enhancement in number of the bright protrusions with the increasing dosage of Ni | S7 |
| <b>Figure S6.</b> STM images showing the non-reconstructed Au(110) surface beneath the molecular chains                                                                 | S7 |
| <b>Figure S7.</b> $dI/dV$ spectrum and calculated DOS of the HS-Ni atom on Au(110)                                                                                      | S8 |
| <b>Figure S8.</b> $dI/dV$ spectrum of the LS-Ni atom on Au(110)                                                                                                         | S9 |
| <b>Figure S9.</b> Energy- $d_{\text{Ni-Ni}}$ dependences of the LS, HS and AFE chains                                                                                   | S9 |

- |                   |     |
|-------------------|-----|
| <b>References</b> | S10 |
|-------------------|-----|

## Supporting Discussion

### 1. Fano-fitting of the $dI/dV$ spectra

The  $dI/dV$  spectrum of the HS-Ni atom on Au(100) measured at zero magnetic field (red in Figure 1b) is fitted by a linear combination of two Fano functions as follow,<sup>1,2</sup>

$$\frac{dI}{dV}(\text{eV}) = A_1 F_1(\text{eV}) + A_2 F_2(\text{eV}) + B$$

$$F_i(\text{eV}) = \frac{(\varepsilon_i + q_i)^2}{1 + \varepsilon_i^2} \quad (i = 1, 2)$$

$$\varepsilon_i = (\text{eV} - \varepsilon_{0i})/\Gamma_i$$

where  $A_1$ ,  $A_2$  and  $B$  are the constants,  $q_i$ ,  $\varepsilon_{0i}$  and  $\Gamma_i$  are the Fano asymmetry parameter, the energy shift with respect to the Fermi level and the half width at half maximum (HWHM) of the  $i$ th Kondo resonance, respectively.

The  $dI/dV$  spectrum of the HS-Ni atom on Au(110) (red in Figure 3c) is fitted by adding a linear term to a single Fano function to deal with the influence of the background resonance in the spectroscopic region as follow,<sup>3,4</sup>

$$\frac{dI}{dV}(\text{eV}) = a \frac{(\varepsilon + q)^2}{1 + \varepsilon^2} + b\text{eV} + c$$

$$\varepsilon = (\text{eV} - \varepsilon_0)/\Gamma$$

where  $a$ ,  $b$  and  $c$  are the constants.

The Kondo temperature  $T_K$  can be extracted from  $\Gamma$  as follow,<sup>5</sup>

$$k_B T_K = \sqrt{\Gamma^2 - (1.75 k_B T)^2 - (0.87 \text{eV}_m)^2 - (\alpha k_B T)^2}$$

where  $k_B$  is the Boltzmann's constant,  $V_m$  is the modulation voltage used for the  $dI/dV$  measurements,  $T$  is the temperature, and  $\alpha$  is a parameter being equal to  $\pi$  as predicted by the Fermi-liquid theory.<sup>6</sup>

## **2. Comparison of the experimental wide-range $dI/dV$ spectrum and the calculated DOS of the LS-Ni on Au(100)**

The wide-range  $dI/dV$  spectrum acquired at a dark LS-Ni atom in the coordination chain on Au(100) shows a strong resonance centered at  $\sim 1.0$  V and a shoulder located at  $\sim -0.3$  V (Figure S3a). In comparison with the calculated DOS of the Ni atom (Figure S3b), we assign the peak at 1.0 V to the calculated electronic state at 1.5 eV (solid black arrow in Figure S3b), and the shoulder at -0.3 V to the calculated state at 0.6 eV (dashed black arrow) in consideration of the Fermi level offset and the underestimation of energy gap in the DFT method.

## **3. Comparison of the experimental wide-range $dI/dV$ spectrum and the calculated DOS of the HS-Ni on Au(110)**

The wide-range  $dI/dV$  spectrum acquired at a bright HS-Ni atom in the coordination chain on Au(110) shows a peak at the Fermi level based on a background broad resonance (Figure S7a). The peak stems from the Kondo effect of the HS-Ni atom. The broad resonance is assigned to the calculated electronic state around the Fermi level, as shown by the theoretical DOS curves (Figure S7b).

## Supporting Figures

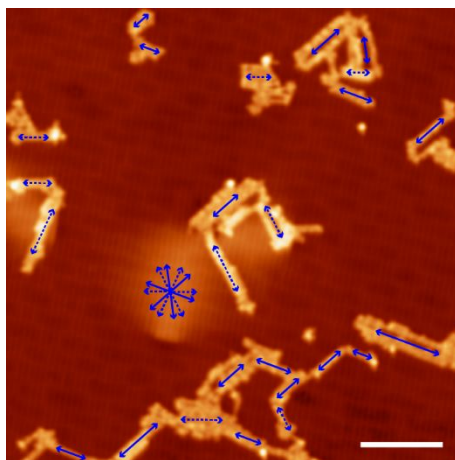

**Figure S1.** Large-area STM image of the coordination chains formed on Au(100) (scanning conditions: bias  $V = 100$  mV, feedback current  $I = 50$  pA, temperature  $T = 4.9$  K). The six extending orientations of the molecular chains are highlighted by the solid and dashed blue arrows. Scale bar: 20 nm.

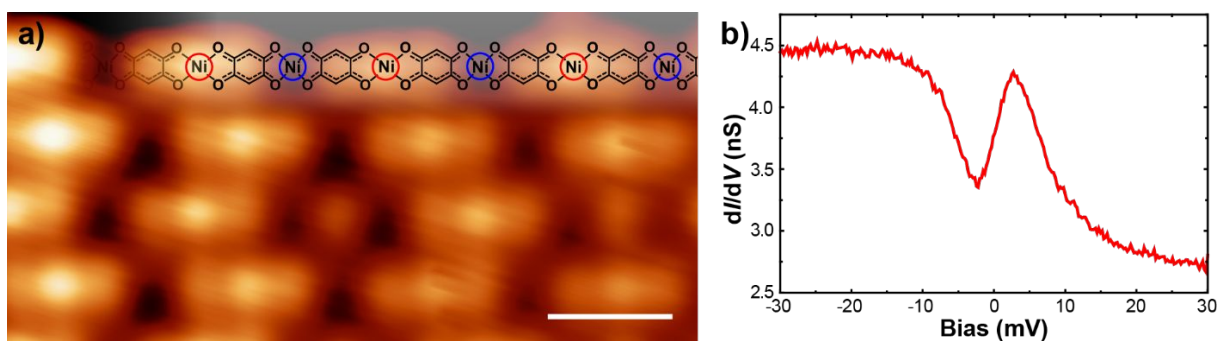

**Figure S2.** (a) STM image of the antiferroelastic phase of the coordination chains formed on Au(111) with the chemical structure superimposed (in constant height mode,  $V = 3$  mV,  $I = 416$  pA at maximum,  $T = 4.9$  K). The HS-Ni ( $S = 1$ ) and LS-Ni ( $S = 0$ ) atoms are marked by the blue and red circles, respectively. (b) A representative  $dI/dV$  spectrum acquired at a HS-Ni atom in the coordination chain on Au(111). The  $dI/dV$  measurement is conducted by using a lock-in amplifier with a modulation of  $V_{\text{rms}} = 1$  mV and a frequency of  $f = 800$  Hz at  $T = 2$  K.

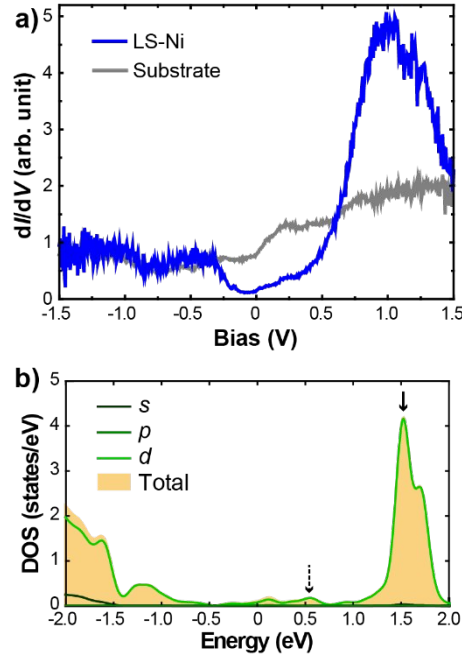

**Figure S3.** (a) Experimental  $dI/dV$  spectra acquired on the bare Au(100) substrate (grey) and at a dark LS-Ni atom in the chain on Au(100) (blue). The  $dI/dV$  spectra are acquired by using a lock-in amplifier with a modulation of  $V_{\text{rms}} = 10$  mV and a frequency of  $f = 973$  Hz at  $T = 4.9$  K. (b) Calculated DOS curves of the LS-Ni atom in the coordination chain on Au(100).

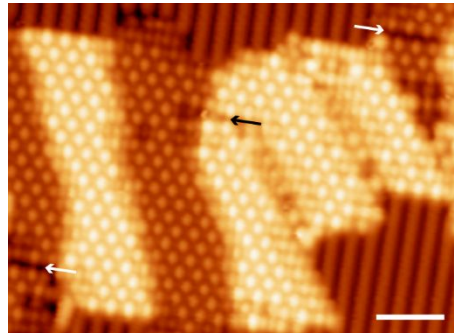

**Figure S4.** STM image of the coordination chains formed on Au(110) ( $V = 100$  mV,  $I = 3.1$  nA,  $T = 4.9$  K). The linear defects between the neighboring chains are marked by the arrows. Scale bar: 3 nm.

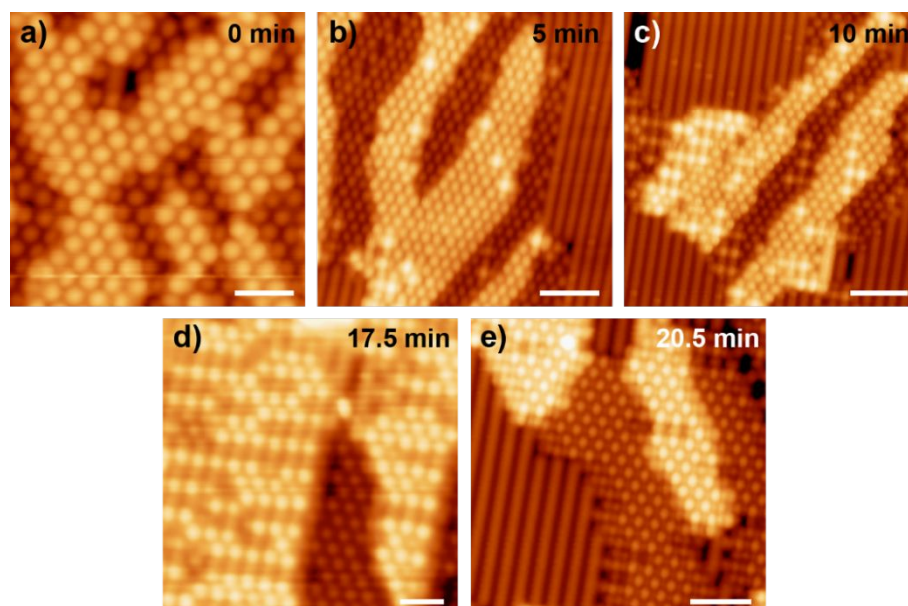

**Figure S5.** STM images of the samples obtained by depositing Ni at 1420 K for (a) 0 min ( $V = -50$  mV,  $I = -100$  pA,  $T = 78$  K), (b) 5 min ( $V = -60$  mV,  $I = -90$  pA,  $T = 78$  K), (c) 10 min ( $V = -50$  mV,  $I = -100$  pA,  $T = 78$  K), (d) 17.5 min ( $V = -100$  mV,  $I = -100$  pA,  $T = 78$  K) and (e) 20.5 min ( $V = 100$  mV,  $I = 2.5$  nA,  $T = 4.9$  K) to the Au(111) surface with pre-covered THB molecules. the samples were heated to about 450 K after deposition of the molecules and Ni. Scale bars: (a) 2 nm, (b) 4 nm, (c) 4 nm, (d) 2 nm and (e) 3 nm.

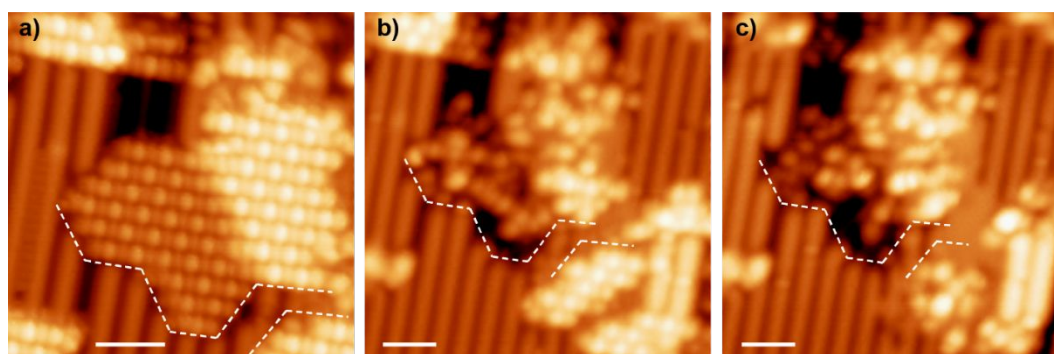

**Figure S6.** STM images of the same area (a) before ( $V = 300$  mV,  $I = 1$  nA,  $T = 4.9$  K) and (b,c) after removing the molecular structures by sequentially parking the tip with a large bias (e.g., 4.3

V) above the molecular islands ( $V = 300$  mV,  $I = 1$  nA,  $T = 4.9$  K). The dashed lines highlight the initial boundaries of the molecular islands. The non-reconstructed substrate surface beneath the molecular chains is exposed after the treatment. Scale bars: 2 nm.

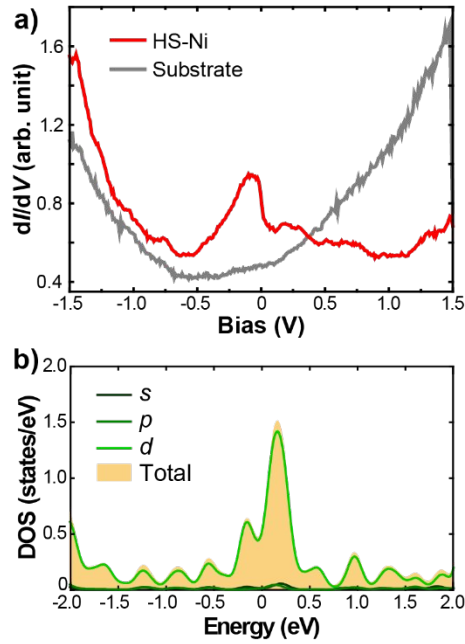

**Figure S7.** (a) Experimental  $dI/dV$  spectra acquired on the bare Au(110) substrate (grey) and at a bright HS-Ni atom in the chain on Au(110) (red). The  $dI/dV$  spectra are acquired by using a lock-in amplifier with a modulation of  $V_{\text{rms}} = 20$  mV and a frequency of  $f = 1.992$  kHz at  $T = 4.9$  K. (b) Calculated DOS curves of the HS-Ni atom in the coordination chain on Au(110).



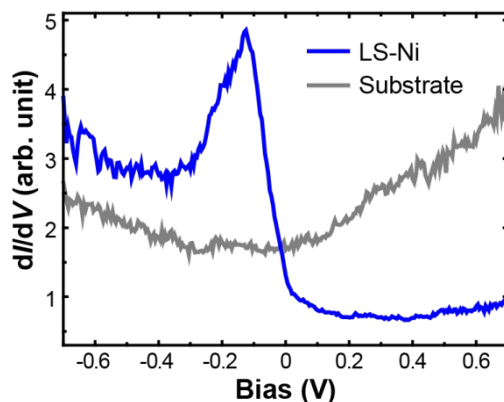

**Figure S8.**  $dI/dV$  spectra acquired on the bare Au(110) substrate (grey) and at a dark LS-Ni atom at the chain ending on Au(110) (blue) showing a resonance centered at  $\sim -0.15$  V. The  $dI/dV$  spectra are acquired by using a lock-in amplifier with a modulation of  $V_{\text{rms}} = 10$  mV and a frequency of  $f = 1.992$  kHz at  $T = 4.9$  K.

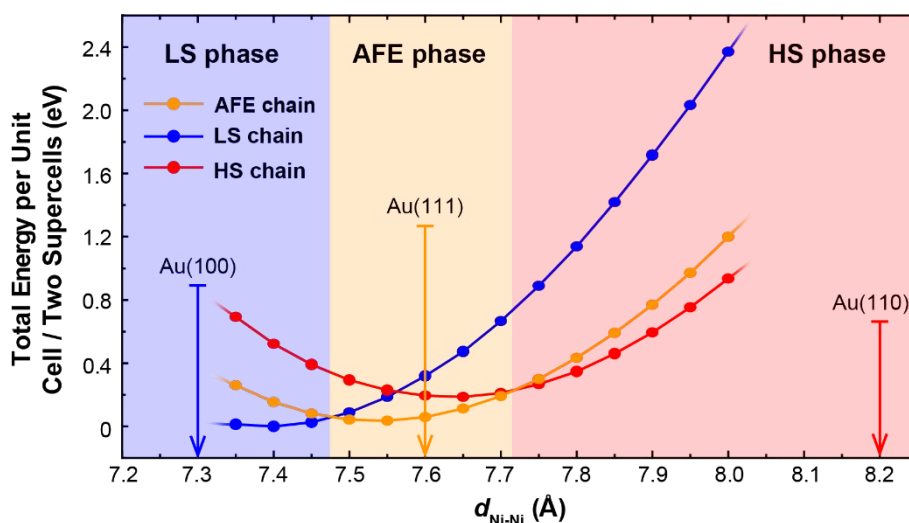

**Figure S9.** Total energy per unit cell for the AFE phase (yellow) or per two supercells for the LS (blue) and HS (red) phases versus  $d_{\text{Ni-Ni}}$  of the coordination chain. The reference point of energy is the energy minimum of the LS phase at  $d_{\text{Ni-Ni}} = 7.40$  Å. The  $d_{\text{Ni-Ni}}$  values of the chains formed on Au(100), Au(111) and Au(110) are marked by the colored arrows. The diagram is adapted with permission from Ref. 5. Copyright 2020 American Chemical Society.

## References

- (1) Franke, K. J.; Schulze, G.; Pascual, J. I. Competition of Superconducting Phenomena and Kondo Screening at the Nanoscale. *Science* **2011**, 332, 940.
- (2) Minamitani, E.; Tsukahara, N.; Matsunaka, D.; Kim, Y.; Takagi, N.; Kawai, M. Symmetry-Driven Novel Kondo Effect in a Molecule. *Phys. Rev. Lett.* **2012**, 109, 086602.
- (3) Pruser, H.; Wenderoth, M.; Weismann, A.; Ulbrich, R. G. Mapping Itinerant Electrons around Kondo Impurities. *Phys. Rev. Lett.* **2012**, 108, 166604.
- (4) Meyer, J.; Ohmann, R.; Nickel, A.; Toher, C.; Gresser, R.; Leo, K.; Ryndyk, D. A.; Moresco, F.; Cuniberti, G. Influence of Organic Ligands on the Line Shape of the Kondo Resonance. *Phys. Rev. B* **2016**, 93, 155118.
- (5) Liu, J.; Gao, Y.; Wang, T.; Xue, Q.; Hua, M.; Wang, Y.; Huang, L.; Lin, N. Collective Spin Manipulation in Antiferroelastic Spin-Crossover Metallo-Supramolecular Chains. *ACS Nano* **2020**, 14, 11283-11293.
- (6) Nagaoka, K.; Jamneala, T.; Grobis, M.; Crommie, M. F. Temperature Dependence of a Single Kondo Impurity. *Phys. Rev. Lett.* **2002**, 88, 077205.
